# Supplementary material for: Metabolomics to Assess Response to Immune Checkpoint Inhibitors in Patients with Non-Small-Cell Lung Cancer
Source: PubMed Central journal article supplement (PMC7760033; doi:10.3390/cancers12123574), 2020-11-30
Supplement: cancers-12-03574-s001.pdf [file cancers-12-03574-s001.pdf]

# Supplementary Materials: Metabolomics to Assess Response to Immune Checkpoint Inhibitors in Patients with Non-Small-Cell Lung Cancer

Veronica Ghini, Letizia Laera, Beatrice Fantechi, Francesca del Monte, Matteo Benelli, Amelia McCartney, Tenori Leonardo, Claudio Luchinat and Daniele Pozzessere

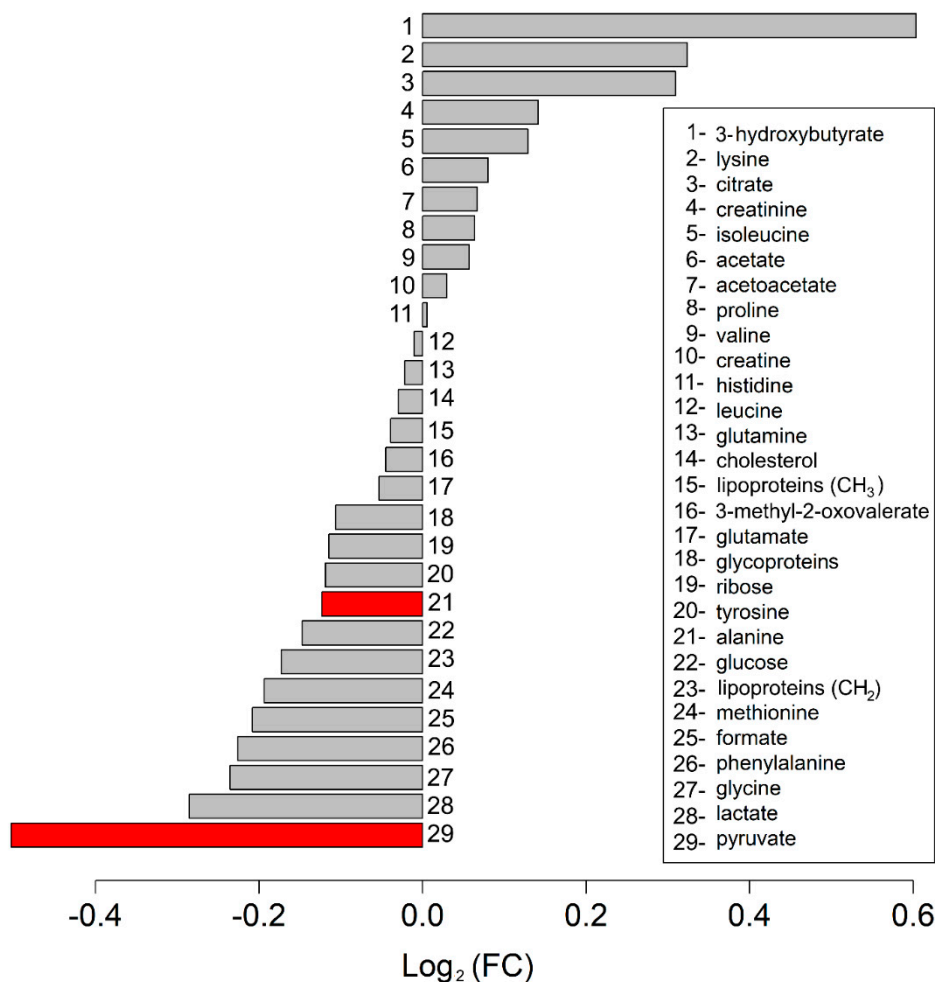

**Figure S1.** Bar plot reporting the values of Log<sub>2</sub> (Fold Change, FC) of quantified metabolites. Metabolites with Log<sub>2</sub> (FC) positive values have higher concentration in plasma samples from responder patients with respect to non-responders. Metabolites with Log<sub>2</sub> (FC) negative values have lower concentration in plasma samples from responder patients with respect to non-responders. Red bars represent *p*-values < 0.05.

**Table S1.** Patient and tumor characteristics for NSCLC cohort. NOS: not otherwise specified; SqCC: squamous histology; adeno: adenocarcinoma.

| ID     | Gender | Age | Histology | Site of Metastasis                | Smoking Status | Drug |
|--------|--------|-----|-----------|-----------------------------------|----------------|------|
| MetL01 | F      | 60  | NOS       | lung, lymph nodes, adrenal, bone  | Former         | Niv  |
| MetL05 | M      | 69  | SqCC      | lung, trachea                     | Former         | Niv  |
| MetL06 | M      | 69  | SqCC      | adrenal, colon                    | Current        | Niv  |
| MetL07 | M      | 56  | SqCC      | lung, lymph nodes                 | Former         | Niv  |
| MetL09 | M      | 45  | SqCC      | lung, bone, kidney                | Current        | Niv  |
| MetL10 | M      | 71  | SqCC      | lung, pleura                      | Former         | Niv  |
| MetL11 | M      | 68  | adeno     | lung, lymph nodes                 | Current        | Niv  |
| MetL12 | M      | 57  | SqCC      | lung, lymph nodes, bone, liver    | Current        | Niv  |
| MetL13 | F      | 75  | adeno     | lung, lymph nodes                 | Former         | Niv  |
| MetL15 | F      | 73  | adeno     | lung, pleura                      | NA             | Niv  |
| MetL17 | F      | 77  | SqCC      | lung                              | Former         | Niv  |
| MetL19 | M      | 67  | adeno     | lung                              | Former         | Niv  |
| MetL20 | F      | 74  | SqCC      | lung, lymph nodes, liver          | Former         | Niv  |
| MetL22 | M      | 59  | adeno     | lung, lymph nodes, bone, pleura   | Current        | Pem  |
| MetL23 | F      | 51  | adeno     | lung, lymph nodes                 | Current        | Pem  |
| MetL24 | M      | 69  | adeno     | lung, bone                        | Former         | Niv  |
| MetL25 | M      | 62  | adeno     | lung, lymph nodes                 | Former         | Pem  |
| MetL26 | F      | 63  | adeno     | lymph nodes, bone                 | Former         | Niv  |
| MetL27 | F      | 74  | adeno     | lung, lymph nodes, adrenal, bone  | Never          | Pem  |
| MetL28 | M      | 76  | adeno     | lymph nodes                       | Current        | Pem  |
| MetL29 | F      | 70  | SqCC      | lung, pleura, bone                | Current        | Niv  |
| MetL30 | F      | 59  | SqCC      | lung, lymph nodes                 | Former         | Niv  |
| MetL31 | M      | 84  | adeno     | lymph nodes, pleura               | Former         | Pem  |
| MetL32 | F      | 70  | SqCC      | lung, lymph nodes, adrenal, brain | Former         | Niv  |
| MetL33 | M      | 77  | SqCC      | lung, lymph nodes                 | Former         | Niv  |
| MetL35 | F      | 69  | adeno     | lung, lymph nodes, brain          | Former         | Pem  |
| MetL34 | F      | 48  | adeno     | lung, pleura, lymph nodes         | NA             | Niv  |
| MetL36 | M      | 76  | adeno     | lung, ureter, thoracic wall       | Former         | Niv  |
| MetL37 | M      | 75  | SqCC      | lung, lymph nodes, adrenal        | Former         | Niv  |
| MetL38 | F      | 81  | adeno     | lung, lymph nodes                 | Former         | Pem  |

|        |   |    |       |                                          |         |     |
|--------|---|----|-------|------------------------------------------|---------|-----|
| MetL39 | M | 68 | adeno | lung, lymph nodes                        | Former  | Niv |
| MetL40 | M | 71 | adeno | lymph nodes, lung                        | Former  | Niv |
| MetL41 | M | 73 | SqCC  | lung, lymph nodes, pleura, adrenal       | Former  | Niv |
| MetL42 | F | 70 | SqCC  | lung, lymph nodes                        | Current | Niv |
| MetL43 | F | 54 | adeno | lung, lymph nodes, pleura, adrenal, bone | Current | Pem |
| MetL44 | F | 62 | adeno | lung, lymph nodes, liver                 | Current | Niv |
| MetL45 | F | 71 | SqCC  | lung, lymph nodes, pleura, thoracic wall | Former  | Niv |
| MetL46 | M | 61 | adeno | lung, lymph nodes, brain                 | Current | Pem |
| MetL47 | M | 50 | adeno | lung, lymph nodes, brain                 | Current | Pem |
| MetL48 | M | 68 | SqCC  | lung, lymph nodes                        | Former  | Niv |
| MetL49 | M | 69 | NOS   | lung, liver, lymph nodes                 | Former  | Niv |
| MetL50 | M | 83 | SqCC  | lung, lymph nodes                        | Former  | Niv |
| MetL51 | F | 61 | adeno | lung, brain                              | Former  | Pem |
| MetL52 | F | 55 | adeno | lung, lymph nodes, brain, adrenal        | Former  | Niv |
| MetL53 | M | 70 | SqCC  | lung, brain, liver, lymph nodes          | Former  | Niv |
| MetL55 | M | 72 | adeno | lung, pleura, lymph nodes, bone          | Current | Pem |
| MetL56 | F | 69 | adeno | lung, brain, lymph nodes                 | Former  | Pem |
| MetL57 | M | 56 | adeno | lung, bone                               | Current | Niv |
| MetL59 | F | 37 | adeno | lung, pleura                             | Never   | Pem |
| MetL60 | M | 75 | adeno | lung, bone                               | Current | Pem |
| MetL63 | M | 57 | NOS   | lung, brain, lymph nodes, adrenal        | Current | Pem |
| MetL65 | M | 72 | adeno | lung, lymph nodes                        | Current | Pem |
| MetL66 | F | 68 | adeno | lung, pleura                             | Never   | Pem |

**Table S2.** List of the metabolites assigned and analyzed in serum samples of NSCLC patients. The Human Metabolome Database (HMDB) compound ID of each metabolite is reported.

| Metabolites                     | HMDB ID   |
|---------------------------------|-----------|
| 3-hydroxybutyrate               | HMDB00011 |
| 3-methyl-2-oxovalerate          | HMDB00491 |
| Acetate                         | HMDB00042 |
| Acetoacetate                    | HMDB00060 |
| L-alanine                       | HMDB00161 |
| Citrate                         | HMDB00094 |
| Creatine                        | HMDB00064 |
| Creatinine                      | HMDB00562 |
| Cholesterol (CH <sub>3</sub> )  | HMDB00067 |
| Formate                         | HMDB00142 |
| L-glycine                       | HMDB00123 |
| D-glucose                       | HMDB00122 |
| L-glutamate                     | HMDB00148 |
| L-glutamine                     | HMDB00641 |
| Glycoproteins (N-Acetyl)        | -         |
| L-histidine                     | HMDB00177 |
| L-isoleucine                    | HMDB00172 |
| Lactate                         | HMDB00190 |
| L-leucine                       | HMDB00687 |
| Lipoproteins (CH <sub>2</sub> ) | -         |
| Lipoproteins (CH <sub>3</sub> ) | -         |
| L-lysine                        | HMDB00182 |
| L-methionine                    | HMDB00696 |
| L-phenylalanine                 | HMDB00159 |
| Pyruvate                        | HMDB00243 |
| L-proline                       | HMDB00162 |
| D-ribose                        | HMDB00283 |
| L-tyrosine                      | HMDB00158 |
| L-valine                        | HMDB00883 |

**Publisher's Note:** MDPI stays neutral with regard to jurisdictional claims in published maps and institutional affiliations.

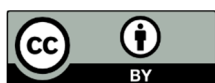

© 2020 by the authors. Licensee MDPI, Basel, Switzerland. This article is an open access article distributed under the terms and conditions of the Creative Commons Attribution (CC BY) license (<http://creativecommons.org/licenses/by/4.0/>).
